# Supplementary material for: The E3 ligase Mule protects the heart against oxidative stress and mitochondrial dysfunction through Myc-dependent inactivation of Pgc-1α and Pink1
Source: PubMed Central journal article supplement (PMC5288653; doi:10.1038/srep41490), 2017-02-02
Supplement: srep41490-s1.pdf [file srep41490-s1.pdf]

## **Supplementary Information**

The E3 ligase Mule protects the heart against oxidative stress and mitochondrial dysfunction through Myc-dependent inactivation of Pgc-1 $\alpha$  and Pink1.

Keith Dadson, Ludger Hauck, Zhenyue Hao, Daniela Grothe, Vivek Rao, Tak W. Mak, and  
Filio Billia

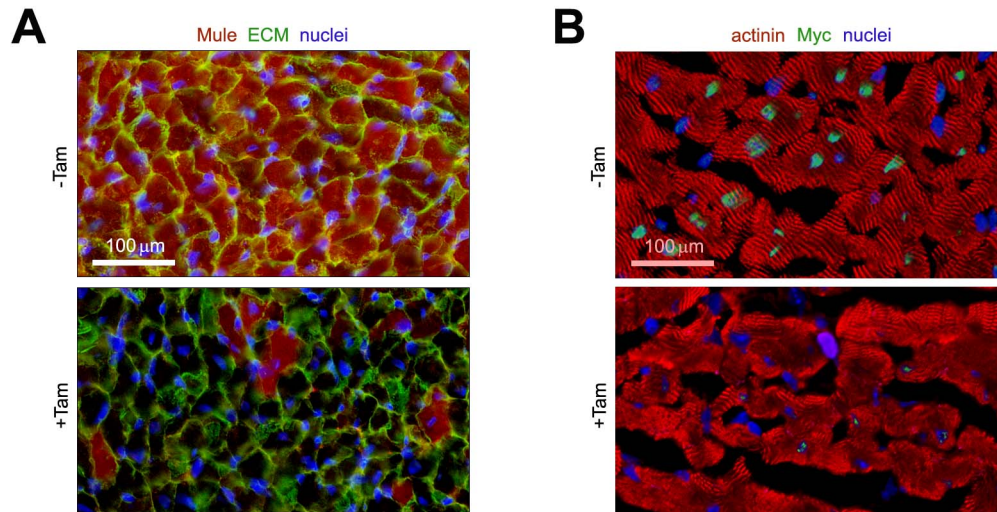

**Supplementary Figure S1: Analysis of recombination efficiency.**

**(A, B)** Confocal immunofluorescence microscopical analysis at 7d post Tam shows that four consecutive daily intraperitoneal Tam injections induced genetic ablation of **Mule and Myc** with high recombination efficiency (> 90%). Mice were 12 weeks old at the time of analysis.

**(A)** Administration of Tam induced marked downregulation of endogenous cytoplasmic Mule expression in left ventricular cardiomyocytes from *Mule<sup>fl/fl(y);mcm</sup>* mice. Specimen were co-stained for immunofluorescence microscopy employing Mule antibodies (red), WGA (green), and Dapi (nuclear DNA; blue).

**(B)** Administration of Tam significantly decreased expression levels of endogenous nuclear Myc in the heart of *Myc<sup>fl/fl;mcm</sup>* mice. Left ventricular samples were treated with anti-Myc and anti- $\alpha$ -actinin antibodies, and co-stained with Dapi. Red,  $\alpha$ -actinin. Green, Myc. Blue, nuclei.

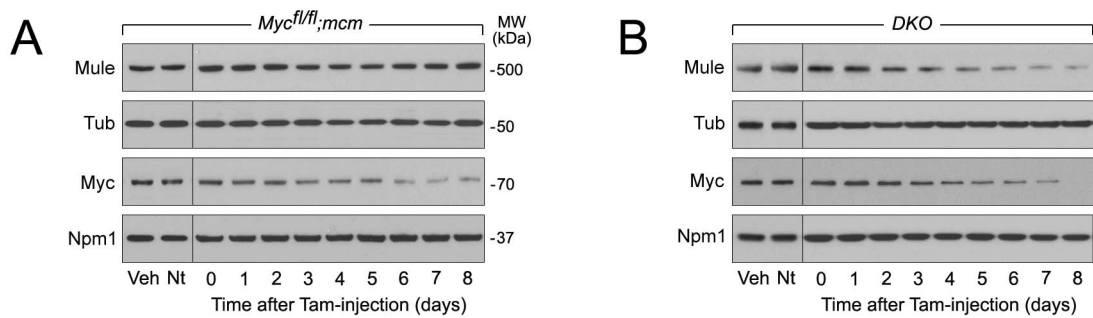

**Supplementary Figure S2:**

**(A)** Administration of Tam induced marked downregulation of endogenous nuclear Myc expression in left ventricular (LV) cardiomyocytes from *Myc<sup>fl/fl</sup>;mcm* mice. Immunoblot analysis of Myc in biochemically fractionated LV extracts (60 µg total protein/lane) was done employing specific antibodies as indicated (left).

**(B)** Administration of Tam significantly decreased expression levels of endogenous cytoplasmic Mule and nuclear Myc in the heart of *Mule<sup>fl/fl(y)</sup>;Myc<sup>fl/fl</sup>;mcm* mice (DKO). LV tissue samples were analyzed by immunoblotting employing antibodies as indicated (left). Western blots were repeated at least once with similar results.

Veh, vehicle injections. Nt, no treatment.

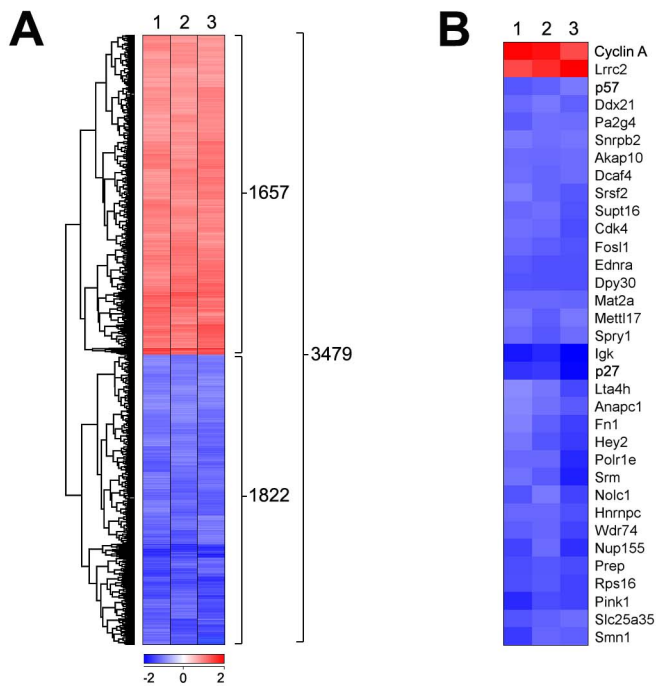

**Supplementary Figure S3: Transcriptomic analysis of Mule mutant hearts.**

**(A)** Genome-wide mRNA microarray profiling reveals that conditional genetic ablation of Mule induces profound alterations in the cardiac transcriptome indicating a most unexpected high degree of complexity associated with Mule network regulation in the heart. Heat map of unsupervised hierarchical cluster analysis at a high confidence threshold identifies 3479 transcripts (rows) out of 33561 entities that were enriched in ventricular samples of *Mule<sup>fl/fl(y);mcm</sup>* mice (columns) post-Tam relative to vehicle-injected controls. Mice were analyzed at 4 weeks post-Tam. Values ( $\log_2$  expression) are shown by color and intensity of shading. Blue, repressed. Red, induced.  $n = 3$  biological replicates.  $P < 0.05$ . Fold change  $>1.3$  and  $< -1.3$ .

**(B)** Heat map examining the impact of genomic modifications in Mule mutant hearts (columns) on previously validated Myc target genes (rows). The majority of these factors was downregulated in *Mule<sup>fl/fl(y);mcm</sup>* mice post-Tam demonstrating that Myc activation is a consequence of inhibiting Mule, and that Myc is involved in the development of the mutant cardiac phenotype.

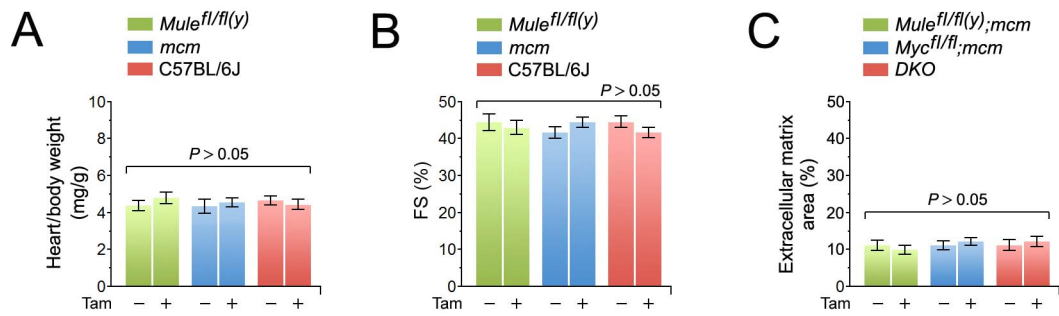

**Supplementary Figure S4:**

(A) Heart-weight corrected for body weight.  $n=4-6$ . Mice were 12 weeks old at the time of analysis.

(B) Fractional shortening (FS) determined by M-mode echocardiography.  $n=4$ .

(C) Quantification of extracellular matrix area by immunofluorescence microscopy employing routine wheat germ agglutinin (WGA-) stained cardiac sections.  $n=4$

(A-C) Data are means  $\pm$  s.e.m.

**Supplementary Table S1:** Primer sequences used in ChIP assays.

| <b>Gene Symbol</b> | <b>Forward</b>           | <b>Reverse</b>         |
|--------------------|--------------------------|------------------------|
| <b>ATP5a</b>       | ACTCGAGGACCCAGGTTTG      | CCACGTGAGTAGCAGAACCA   |
| <b>Bckdhb</b>      | CTTTAAATCAGTCATTCAACTTGC | CAGACGGAAGCCATAACCAAG  |
| <b>Cox4i1</b>      | TCTTGGTCTTCCGGTTGC       | CACACCTCCTGCGACTAGA    |
| <b>Cox10</b>       | CACAGAAATGCTAACCTCATTCC  | GGAGCTTATAAAGATCGGATGG |
| <b>Esrrb</b>       | CCGGGAGCTTATGTCAACTG     | AGAGAGCCGGTGAGTACAGG   |
| <b>Got1</b>        | ACAAAACGCCCAAGTACAGG     | GTGGGGAAAGCAGAGAACAG   |
| <b>Gstm1</b>       | GGACAGTGTTCTTGGGAGGA     | ACCAGAGCAGCAGACCCTAA   |
| <b>Hk2</b>         | GGAACACACGTCCCAACTCT     | AGTCGGGGCCAAATAGAGAA   |
| <b>Ndufa4</b>      | GCCAGTGAAAGTCAGGAAGC     | GTCACCCAGGACCTCCTACC   |
| <b>Ndufa8</b>      | TGAGCCATCTCTCCAGCTCT     | GCCATTCCAGGAAGTCTAGC   |
| <b>Pgc-1a</b>      | TGTGGCGGTTTTGTTGACTA     | TCCCCAGTCACATGACAAAG   |
| <b>Pink1</b>       | CAAGCAGTTTAAGTCATAGGGATT | TGGGACAACAACAAACTTCG   |
| <b>Ppara</b>       | CCTAGGGGGCGGAGTTTC       | CAGGGGACAACCAGAGGAC    |
| <b>Pparg</b>       | CAGCACCAACCACCTGTAAC     | GTGCTGTGCGTCGGTGAG     |

**Supplementary Table S2:** Primer sequences used in RT-qPCR assays.

| <b>Gene Symbol</b>              | <b>Forward</b>          | <b>Reverse</b>          |
|---------------------------------|-------------------------|-------------------------|
| <b>Acta1</b>                    | CCCAAAGCTAACCGGGAGAAG   | CCAGAATCCAACACGATGCC    |
| <b>Acta2</b>                    | GTCCCAGACATCAGGGAGTAA   | TCGGATACTTCAGCGTCAGGA   |
| <b><math>\beta</math>-actin</b> | GAAATCGTGCGTGACATCAAAG  | TGTAGTTTCATGGATGCCACAG  |
| <b>Actn1</b>                    | GACCATTATGATTCCCAGCAGAC | CGGAAGTCCTCTTCGATGTTCTC |
| <b>Actn4</b>                    | ATGGTGGACTACCACGCAG     | CAGCCTTCCGAAGATGAGAGT   |
| <b>ANP</b>                      | GCTTCCAGGCCATATTGGAG    | GGGGGCATGACCTCATCTT     |
| <b>ATP5a1</b>                   | TCTCCATGCCTCTAACACTCG   | CCAGGTCAACAGACGTGTCAG   |
| <b>ATP5i2</b>                   | TGCCGAGCTGGATAATGATGC   | ACCATGCTAATCCCCGAGATG   |
| <b>B2m</b>                      | TTCTGGTGCTTGTCTCACTGA   | CAGTATGTTCTGGCTTCCCATTC |
| <b>Bckdhb</b>                   | AGCTATTGCGGAAATCCAGTTT  | ACAGTTGAAAAGATCACCTGAGC |
| <b>Bckdk</b>                    | ACATCAGCCACCGATAACACAC  | GAGGCGAACTGAGGGCTTC     |
| <b>BNP</b>                      | GAGGTCACCTATCCTCTGG     | GCCATTTCTCCGACTTTTCTC   |
| <b>Cat</b>                      | AGCGACCAGATGAAGCAGTG    | TCCGCTCTCTGTCAAAGTGTG   |
| <b>Cox4i1</b>                   | ATTGGCAAGAGAGCCATTTCTAC | CACGCCGATCAGCGTAAGT     |
| <b>Cox10</b>                    | AGAAGAGCTATACAGGGATTGCC | CTGTGTGACATACATGCGCTT   |
| <b>Cytb</b>                     | TTCTGAGGTGCCACAGTTATT   | GAAGGAAAGGTATTAGGGCTAAA |
| <b>Got1</b>                     | GCGCCTCCATCAGTCTTTG     | ATTCATCTGTGCGGTACGCTC   |
| <b>Gpi1</b>                     | TCAAGCTGCGCGAACTTTTTG   | GGTTCTTGGAGTAGTCCACCAG  |
| <b>Gpt2</b>                     | AACCATTCACTGAGGTAATCCGA | GGGCTGTTTAGTAGGTTTGGGTA |
| <b>Gsta3</b>                    | AAGAATGGAGCCTATCCGGTG   | CCATCACTTCGTAACCTTGCC   |
| <b>Gstm1</b>                    | ATACTGGGATACTGGAACGTCC  | AGTCAGGGTTGTAACAGAGCAT  |
| <b>Gstp1</b>                    | ATGCCACCATACACCATTGTC   | GGGAGCTGCCCATACAGAC     |
| <b>Gstp2</b>                    | CATTACAGGGCAGCAGGAGT    | CATATGGCTCCCTCTTGTC     |
| <b>Hk1</b>                      | AGGGCGCATTACTCCAGAG     | CCCTGTGGGTGTCTTGTGTG    |
| <b>Hk2</b>                      | TGATCGCCTGCTTATTCACGG   | AACCGCCTAGAAATCTCCAGA   |

**Supplementary Table S2:** Primer sequences used in RT-qPCR assays (continued).

| <b>Gene Symbol</b>              | <b>Forward</b>          | <b>Reverse</b>          |
|---------------------------------|-------------------------|-------------------------|
| <b><math>\alpha</math>-MHC</b>  | GCCCAGTACCTCCGAAAGTC    | GCCTTAACATACTCCTCCTTGTC |
| <b><math>\alpha</math>-MHC</b>  | GCCCAGTACCTCCGAAAGTC    | GCCTTAACATACTCCTCCTTGTC |
| <b><math>\beta</math>-MHC</b>   | ACTGTCAACACTAAGAGGGTCA  | TTGGATGATTTGATCTTCCAGGG |
| <b>Ndufa4</b>                   | TCCCAGCTTGATTCTCTCTT    | GGGTTGTTCTTTCTGTCCCAG   |
| <b>Ndufa8</b>                   | GGAGCTGCCAACTCTGGAAG    | CCAGCGGCACAGCATAAAC     |
| <b>Ndufv1</b>                   | TTTCTCGGCGGGTTGGTTC     | GGTTGGTAAAGATCCGGTCTTC  |
| <b>Pgc-1<math>\alpha</math></b> | TATGGAGTGACATAGAGTGTGCT | CCACTTCAATCCACCCAGAAAG  |
| <b>Pgc-1<math>\beta</math></b>  | TCCTGTAAAAGCCCGGAGTAT   | GCTCTGGTAGGGGCAGTGA     |
| <b>Pink1</b>                    | TTCTTCCGCCAGTCGGTAG     | CTGCTTCTCCTCGATCAGCC    |
| <b>Ppara<math>\alpha</math></b> | AGAGCCCCATCTGTCCTCTC    | ACTGGTAGTCTGCAAAACCAA   |
| <b>Ppar<math>\gamma</math></b>  | TCGCTGATGCACTGCCTATG    | GAGAGGTCCACAGAGCTGATT   |
| <b>Tgm2</b>                     | GACAATGTGGAGGAGGGATCT   | CTCTAGGCTGAGACGGTACAG   |
| <b>Tnnc1</b>                    | GCGGTAGAACAGTTGACAGAG   | CCAGCTCCTTGGTGCTGAT     |
| <b>Tnnt1</b>                    | CCTGTGGTGCCTCCTTTGATT   | TGCGGTCTTTTAGTGCAATGAG  |



**Supplementary Table S3:** Antibodies employed for ChIP, IF, IP and WB.

| Gene name                     | Catalog No. | Vendor         | Application      | Dilution Factor                        |
|-------------------------------|-------------|----------------|------------------|----------------------------------------|
| $\alpha$ -actinin, sarcomeric | A7811       | Sigma          | IF               | 50                                     |
| Atp5a                         | ab14748     | Abcam          | WB               | 1000                                   |
| Atp5b                         | ab14730     | Abcam          | WB               | 1000                                   |
| BrdU                          | MCA2060     | AbD Serotec    | IF               | 50                                     |
| Cat                           | 14097       | Cell Signaling | WB               | 1000                                   |
| Complex I                     | ab109798    | Abcam          | IP               | 5 $\mu$ g                              |
| Complex IV                    | ab109863    | Abcam          | IP               | 5 $\mu$ g                              |
| Cox4i1                        | ab16056     | Abcam          | WB               | 1000                                   |
| Cox10                         | ab84053     | Abcam          | WB               | 1000                                   |
| CytC                          | ab13575     | Abcam          | WB               | 1000                                   |
| Gpdh1                         | ab87230     | Abcam          | WB               | 1000                                   |
| Gst1                          | ab53940     | Abcam          | WB               | 1000                                   |
| Gstm1                         | ab178684    | Abcam          | WB               | 1000                                   |
| Pink1                         | 3929-100    | BioVision      | WB               | 1000                                   |
| Prdx1                         | 8499        | Cell Signaling | WB               | 1000                                   |
| Sod2                          | 13194       | Cell Signaling | WB               | 1000                                   |
| Mef2a                         | ab32866     | Abcam          | IF               | 50                                     |
| Mule                          | Ab70161     | Abcam          | IF WB            | 50/1000                                |
| Myc                           | sc-764      | Santa Cruz     | IF IP<br>WB ChIP | 50 - 7.5 $\mu$ g<br>1000 - 7.5 $\mu$ g |
| Ndufa4                        | ab129752    | Abcam          | WB               | 1000                                   |
| Ndufa8                        | BS3336      | BioWorld       | WB               | 1000                                   |
| normal rabbit IgG             | 2729        | Cell Signaling | CHIP             | 7.5 $\mu$ g                            |
| Npm1                          | B0556       | Sigma          | WB               | 1000                                   |
| Opal                          | ab42364     | Abcam          | WB               | 1000                                   |
| Pgc-1 $\alpha$                | 3934-100    | BioVision      | WB               | 1000                                   |
| Ppara $\alpha$                | PAB11321    | Abnova         | WB               | 1000                                   |
| Ppara $\gamma$                | PAB11321    | Abnova         | WB               | 1000                                   |
| Sdhb                          | ab14714     | Abcam          | WB               | 1000                                   |
| ubiquitin                     | 13-1600     | Thermo Fisher  | WB               | 7.5 $\mu$ g                            |
| tubulin                       | 2146        | Cell Signaling | WB               | 1000                                   |

ChIP, chromatin immunoprecipitation. IF, immunofluorescence microscopy. IP, immunoprecipitation. WB, Western blot.

**Supplementary Table S4:** Patient characteristics of human LV samples as in Fig. 1A.

| <b>Etiology of HF syndrome</b> | <b>Age (years)</b> | <b>Sex</b> |
|--------------------------------|--------------------|------------|
| <b>Familial DCM</b>            | 47                 | Female     |
| <b>Familial DCM</b>            | 50                 | Female     |
| <b>Idiopathic DCM</b>          | 51                 | Female     |
| <b>Idiopathic DCM</b>          | 47                 | Male       |
| <b>Idiopathic DCM</b>          | 24                 | Female     |
| <b>Idiopathic DCM</b>          | 55                 | Male       |
| <b>Idiopathic DCM</b>          | 48                 | Male       |
| <b>Idiopathic DCM</b>          | 59                 | Male       |
| <b>Idiopathic DCM</b>          | 60                 | Female     |
| <b>Idiopathic DCM</b>          | 71                 | Female     |
| <b>Idiopathic DCM</b>          | 64                 | Male       |
| <b>Idiopathic DCM</b>          | 61                 | Male       |
| <b>Idiopathic DCM</b>          | 44                 | Female     |
| <b>Idiopathic DCM</b>          | 24                 | Female     |
| <b>Idiopathic DCM</b>          | 26                 | Male       |
| <b>Idiopathic DCM</b>          | 58                 | Male       |
| <b>Idiopathic DCM</b>          | 56                 | Female     |
| <b>Idiopathic DCM</b>          | 46                 | Male       |
| <b>Congenital CM</b>           | 16                 | Female     |
| <b>Congenital CM</b>           | 31                 | Male       |
| <b>Congenital CM</b>           | 57                 | Female     |
| <b>Ischemic CM</b>             | 46                 | Male       |
| <b>Ischemic CM</b>             | 45                 | Male       |
| <b>Ischemic CM</b>             | 61                 | Male       |
| <b>Ischemic CM</b>             | 69                 | Male       |
| <b>Ischemic CM</b>             | 58                 | Male       |
| <b>Ischemic CM</b>             | 53                 | Male       |
| <b>Ischemic CM</b>             | 51                 | Male       |
| <b>Ischemic CM</b>             | 67                 | Male       |

Informed consent was obtained from patients with end-stage HF who were to have a left ventricular assist device inserted as either a bridge to a heart transplant or as destination therapy to end of life. Samples were obtained from the LV apex and frozen in liquid nitrogen at the time of procurement.

**Supplementary Table S4:** Patient characteristics of human LV samples as in Fig. 1A (continued).

| <b>Etiology of HF syndrome</b> | <b>Age (years)</b> | <b>Sex</b> |
|--------------------------------|--------------------|------------|
| <b>Ischemic CM</b>             | 44                 | Male       |
| <b>Ischemic CM</b>             | 59                 | Male       |
| <b>Ischemic CM</b>             | 62                 | Male       |
| <b>Ischemic CM</b>             | 66                 | Male       |
| <b>Ischemic CM</b>             | 58                 | Male       |
| <b>Myocarditis</b>             | 57                 | Male       |
| <b>Myocarditis</b>             | 50                 | Male       |
| <b>Myocarditis</b>             | 41                 | Male       |
| <b>Chemotherapy-induced CM</b> | 55                 | Male       |
| <b>Chemotherapy-induced CM</b> | 51                 | Female     |
| <b>Chemotherapy-induced CM</b> | 36                 | Male       |
| <b>Chemotherapy-induced CM</b> | 62                 | Female     |
| <b>Control</b>                 | 24                 | Male       |
| <b>Control</b>                 | 21                 | Male       |
| <b>Control</b>                 | 27                 | Male       |
| <b>Control</b>                 | 26                 | Male       |
| <b>Control</b>                 | 21                 | Male       |
| <b>Control</b>                 | 24                 | Male       |
| <b>Control</b>                 | 27                 | Male       |
| <b>Control</b>                 | 24                 | Male       |

Informed consent was obtained from patients with end-stage HF who were to have a left ventricular assist device inserted as either a bridge to a heart transplant or as destination therapy to end of life. Samples were obtained from the LV apex and frozen in liquid nitrogen at the time of procurement.
